# Supplementary material for: Use of a novel layered titanoniobate as an anode material for long cycle life sodium ion batteries
Source: Royal Society of Chemistry journal article supplement (doi:10.1039/c6ra02530g), 2016-01-01
Supplement: c6ra02530g1.pdf [file c6ra02530g1.pdf]

Electronic Supplementary Material (ESI) for RSC Advances.  
This journal is © The Royal Society of Chemistry 2014

## Supporting Information

### **A novel layered titanoniobate as anode material for long-life sodium-ion batteries**

Keyu Xie<sup>a</sup>, Wenfei Wei<sup>a</sup>, Haoran Yu<sup>a</sup>, Manjiao Deng<sup>b</sup>, Shanming Ke<sup>b\*\*</sup>, Xierong Zeng<sup>b</sup>, Zhihua

Li<sup>c</sup>, Chao Shen<sup>a</sup>, Jian-gan Wang<sup>a</sup> and Bingqing Wei<sup>a,d\*</sup>

*a State Key Laboratory of Solidification Processing and Center for Nano Energy Materials,  
Northwestern Polytechnical University, Xi'an, 710072, China*

*b Shenzhen Key Laboratory of Special Functional Materials, College of Materials Science and  
Engineering, Shenzhen University, Shenzhen 518060, PR China*

*c School of Materials Science and Engineering, Central South University, Changsha, Hunan,  
410083, China*

*d Department of Mechanical Engineering, University of Delaware, Newark, DE 19716, USA E-  
mail: weib@udel.edu ; smke@szu.edu.cn*

## Experimental

### 1. Materials

Niobium (V) oxide ( $\text{Nb}_2\text{O}_5$ , AR), titanium dioxide ( $\text{TiO}_2$ , AR) and cesium carbonate ( $\text{Cs}_2\text{CO}_3$ , AR) were purchased from Aladdin (Shanghai). Hydrochloric acid (HCl, 36%), and tetrabutylammonium hydroxide (TBAOH, 10% in water) were obtained from Sinapharm chemical reagent Co., Ltd (Shanghai). All the chemicals were analytic grade and used as received without further purification.

### 2. Synthesis of the protonated derivative $\text{HTi}_2\text{NbO}_7$

Layered  $\text{CsTi}_2\text{NbO}_7$  materials were prepared by solid-state calcination at 1373K for 12h using  $\text{Cs}_2\text{CO}_3$ ,  $\text{TiO}_2$  and  $\text{Nb}_2\text{O}_5$  as raw materials in a molar ratio of 1.1: 4: 1. A 10% molar excess of  $\text{Cs}_2\text{CO}_3$  were added to compensate for loss due to their volatilization at high temperature.

The proton exchange reaction was carried out by adding 1g  $\text{CsTi}_2\text{NbO}_7$  to 100ml acid solution (1M) under magnetic stirring at 60°C. The solution was renewed with fresh one every 8h for ensuring the concentration of acid during the reaction. The solutions were kept stationary at ambient temperature for 4h after stirred 24h. Then the precipitate was filtered, washed with pure water three times. Finally, the  $\text{HTi}_2\text{NbO}_7$  was obtained by heating the precipitate at vacuum 423K for 2h.

### 3. Characterization

The crystalline structure of the as-prepared samples were characterized by powder X-ray diffraction (XRD, D8) with  $\text{CuK}\alpha$  radiation ( $\lambda=1.5406 \text{ \AA}$ ) from 7 to 90°. The scanning electron microscopy (SEM, SU-70) was used to characterize the microscope morphology of the samples. The  $\text{N}_2$  adsorption/desorption tests were determined by Brunauer–Emmett–Teller (BET) measurements using an ASAP-2020 surface area analyser.

#### **4. Electrode fabrication and electrochemical characterization**

HTi<sub>2</sub>NbO<sub>7</sub> was tested as an anode electrode material in CR2032 coin cell. Typically, the electrodes were fabricated by spreading a slurry of HTi<sub>2</sub>NbO<sub>7</sub> (70%), conductive carbon black (20%) and PVDF (10%) mixed in N-methyl pyrrolidinone (NMP) onto a Cu foil. After drying in air at 60 °C for 5 h, the working electrode would be further dried at 110 °C under vacuum one night. Coin cells were assembled in an Ar-filled glove box with a 1 M NaClO<sub>4</sub> in ethylene carbonate (EC)/propylene carbonate (PC) (1:1 w/w) as the electrolyte, glass-fiber (Whatman GF/D) separator and Na sheet as the cathode electrode. All the coin cells were tested at the range of 0.01-3 V. The electrochemical performance a cyclic voltammogram (CV) was obtaining by using electrochemical workstation (Solartron Analytical 1400) at a scan rate of 0.01 mV S<sup>-1</sup>. Galvanostatic charging/discharging cycles were tested at different rates on Land BT2013A battery testing system.

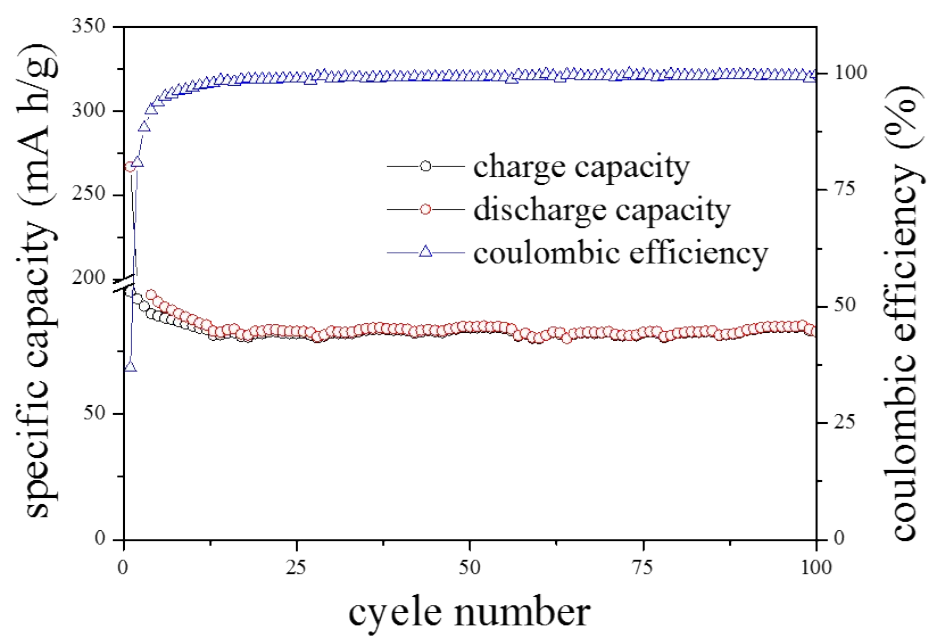

**Figure S1** Cycle performance of conductive carbon at 100 mA g<sup>-1</sup>.

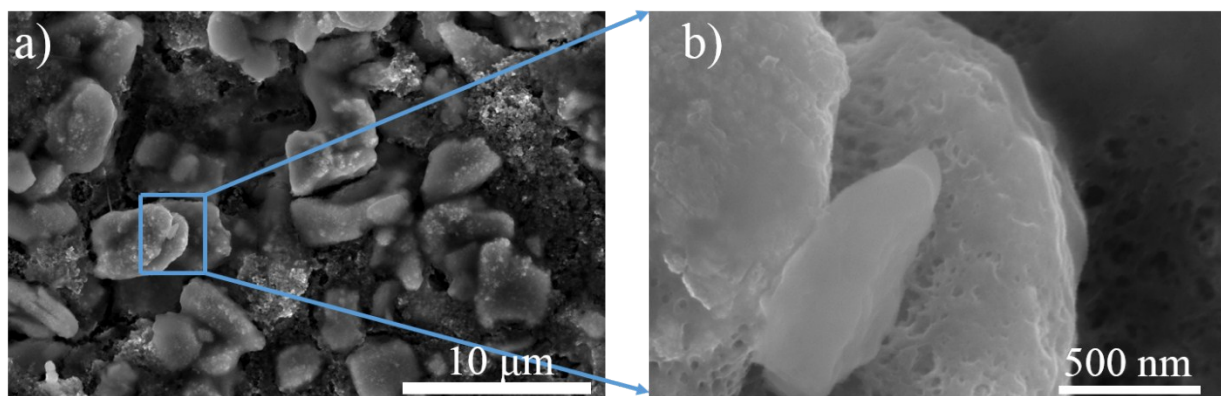

**Figure S2** SEM images of the  $\text{HTi}_2\text{NbO}_7$  after 2000 cycles.
